# Supplementary material for: Hydrothermal approach and luminescent properties for the synthesis of orthoniobates GdNbO4:Ln3+(Ln = Dy, Eu) single crystals under high-temperature high-pressure conditions
Source: Royal Society of Chemistry journal article supplement (doi:10.1039/c4nj00399c), 2014-01-01
Supplement: c4nj00399c1.pdf [file c4nj00399c1.pdf]

**Electronic Supplementary Information (ESI):**

**Hydrothermal Approach and Luminescent Properties for  
Synthesis of Orthoniobates  $\text{GdNbO}_4:\text{Ln}^{3+}$  (Ln = Dy, Eu)  
Single Crystals under High-Temperature High-Pressure  
Conditions**

Min Yang<sup>a</sup>, Xudong Zhao<sup>a\*</sup>, Ying Ji<sup>a</sup>, Fuyang Liu<sup>a</sup>, Wei Liu<sup>a</sup>, Jiayin Sun<sup>b</sup>, Xiaoyang Liu<sup>a\*</sup>

<sup>a</sup> State Key Laboratory of Inorganic Synthesis and Preparative Chemistry  
Jilin University, 2699 Qianjin Street, Changchun.

<sup>b</sup> School of Chemistry & Chemical Engineering, Anqing Normal University, Anqing,  
Anhui 246011, China.

\* E-mail: liuxy@jlu.edu.cn;

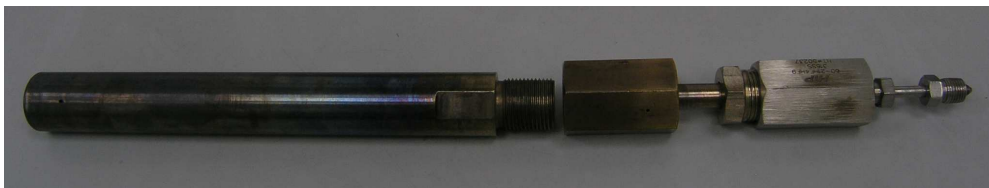

Fig. S1 Model HR-1B-2, LECO hydrothermal synthesis reactor

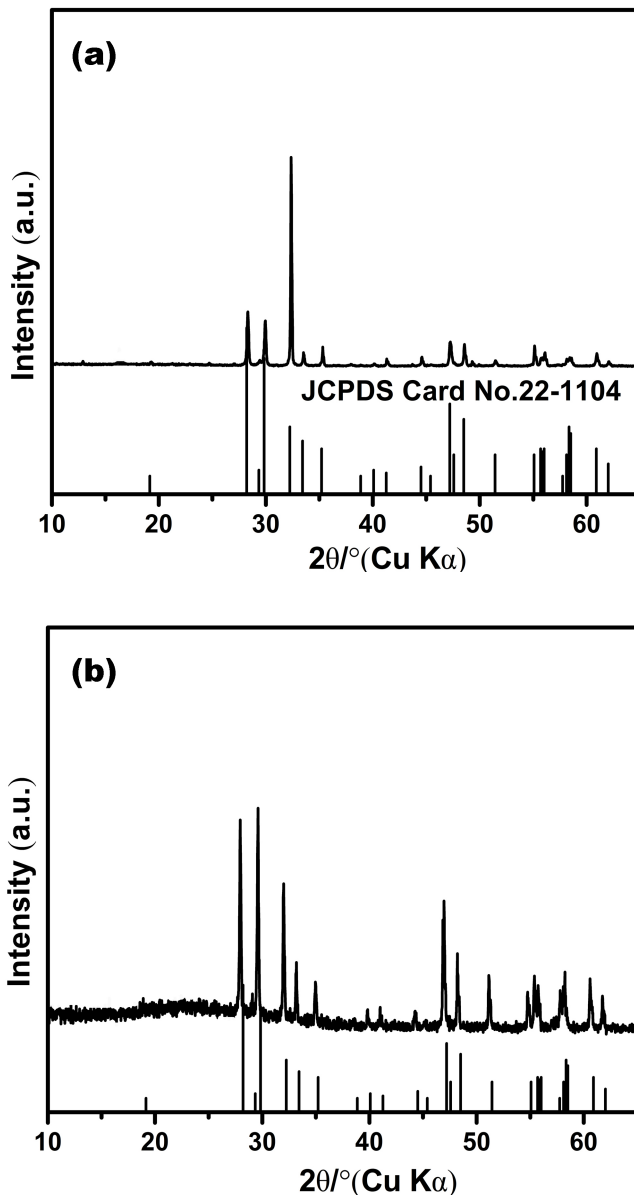

Fig. S2. (a) Power XRD pattern of the as-synthesized Dy<sup>3+</sup> doped GdNbO<sub>4</sub>; (b) Power XRD pattern of the as-synthesized Eu<sup>3+</sup> doped GdNbO<sub>4</sub>.

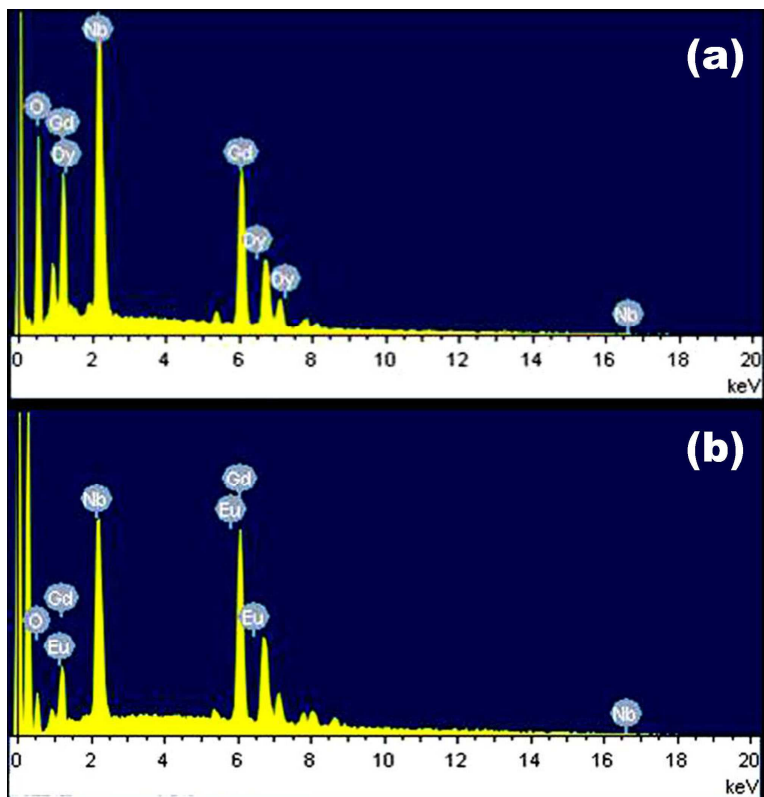

**Fig. S3** (a) EDS spectrum of the as-synthesized  $\text{Dy}^{3+}$  doped  $\text{GdNbO}_4$ . (b) EDS spectrum of the as-synthesized  $\text{Eu}^{3+}$  doped  $\text{GdNbO}_4$ .

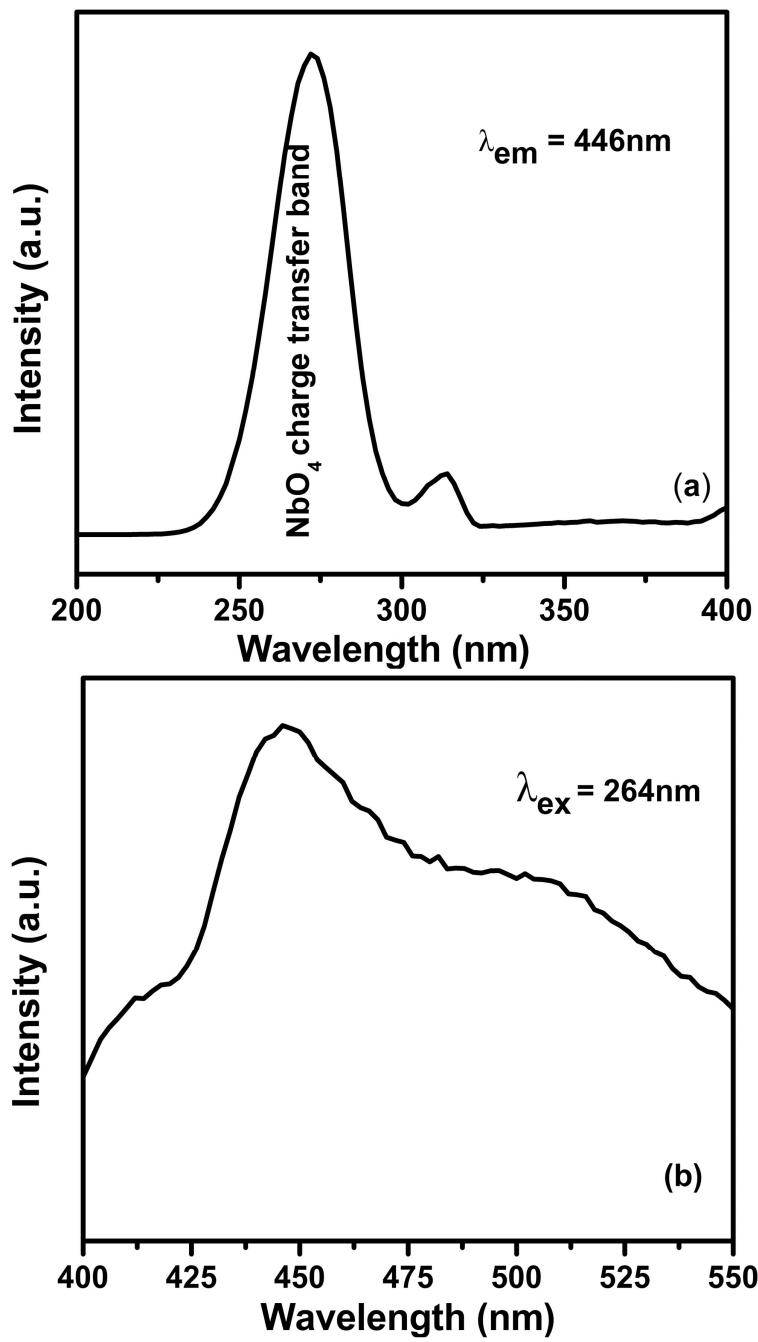

Fig. S4 (a) Excitation (a) and emission (b) spectra of GdNbO<sub>4</sub>.

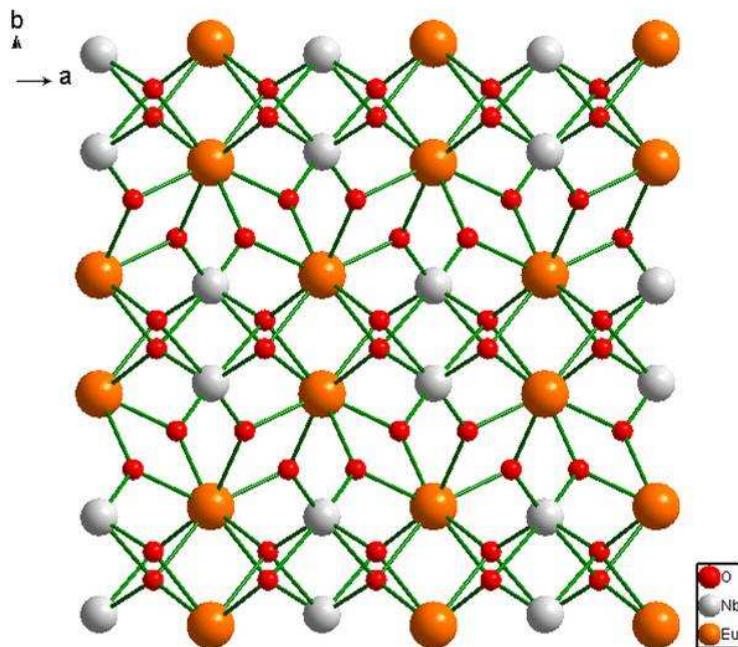

**Fig. S5.** Crystal structure of  $\text{Eu}^{3+}$  doped  $\text{GdNbO}_4$  showing coordination geometry of the  $\text{GdO}_8$  polyhedron and  $\text{NbO}_6$  polyhedron therein and 3D packing viewed along the  $c$  axis. Orange, white and red spheres represent Eu, Nb and O atoms, respectively.

**Table S1.** Crystallographic Data for Gd(OH)<sub>3</sub>

---

|                                                   |                                   |
|---------------------------------------------------|-----------------------------------|
| Chemical formula                                  | Gd(OH) <sub>3</sub>               |
| Formula weight (g/mol)                            | 205.25                            |
| Temperature (K)                                   | 296(2)                            |
| Wavelength (nm)                                   | 0.071073 (Mo)                     |
| Crystal system                                    | hexagonal                         |
| Unit cell dimensions/nm                           | $a = 0.6350$ (12)                 |
|                                                   | $b = 0.6350$ (12)                 |
|                                                   | $c = 0.3642$ (15)                 |
| Cell volume (nm <sup>3</sup> ), Z                 | 0.1272 (6), 2                     |
| Density (g/cm <sup>3</sup> ), calculated          | 5.360                             |
| Crystal size (mm)                                 | 0.1×0.030×0.030                   |
| Θ range for data collection                       | 3.71-24.61 °                      |
| Goodness-of-fit on $F^2$                          | 1.263                             |
| Final $R$ indices [ $I > 2\sigma(I)$ ]            | $R_1 = 0.0199$ , $wR_2 = 0.0467$  |
| $R$ indices (all data)                            | $R_1 = 0.0201$ , $wR_2 = 0.04681$ |
| Extinction coefficient                            | 0.33(3)                           |
| Largest diff. peak and hole/(e·nm <sup>-3</sup> ) | 1.346 and -0.996                  |

---

**Table S2.** Crystallographic Data for Dy<sup>3+</sup>, Eu<sup>3+</sup> doped GdNbO<sub>4</sub>

| Chemical formula                                        | GdNbO <sub>4</sub> :Dy <sup>3+</sup>                                  | GdNbO <sub>4</sub> :Eu <sup>3+</sup>                                 |
|---------------------------------------------------------|-----------------------------------------------------------------------|----------------------------------------------------------------------|
| Formula weight (g/mol)                                  | 314.16                                                                | 308.87                                                               |
| Temperature (K)                                         | 296(2)                                                                | 296(2)                                                               |
| Wavelength (nm)                                         | 0.071073 (Mo)                                                         | 0.071073 (Mo)                                                        |
| Crystal system<br>space group                           | monoclinic,<br><i>C2/c</i>                                            | Monoclinic<br><i>C2/c</i>                                            |
| Unit cell<br>dimensions/nm                              | <i>a</i> = 0.7160(5)<br><i>b</i> = 1.1170(10)<br><i>c</i> = 0.5139(4) | <i>a</i> = 0.7062(2)<br><i>b</i> = 1.1019(3)<br><i>c</i> = 0.5063(4) |
| Cell volume (nm <sup>3</sup> ),<br><i>Z</i>             | 0.3095(4), <i>Z</i> = 4                                               | 0.2956 (8), 4                                                        |
| Density (g/cm <sup>3</sup> )<br>(calculated)            | 6.743                                                                 | 6.940                                                                |
| Crystal size (mm)                                       | 0.05×0.03×0.03                                                        | 0.08×0.050×0.050                                                     |
| $\theta$ range for data<br>collection                   | 3.70-25.00 °                                                          | 3.70-25.00 °                                                         |
| Goodness-of-fit on $F^2$                                | 1.204                                                                 | 1.115                                                                |
| Final <i>R</i> indices<br>[ <i>I</i> > 2σ( <i>I</i> ) ] | <i>R</i> <sub>1</sub> = 0.0548, <i>wR</i> <sub>2</sub> =<br>0.1490    | <i>R</i> <sub>1</sub> = 0.0515,<br><i>wR</i> <sub>2</sub> = 0.1604   |
| <i>R</i> indices (all data)                             | <i>R</i> <sub>1</sub> = 0.0549,<br><i>wR</i> <sub>2</sub> = 0.1492    | <i>R</i> <sub>1</sub> = 0.0515,<br><i>wR</i> <sub>2</sub> = 0.1604   |
| Extinction<br>coefficient                               | 0.024(2)                                                              | 0.034(6)                                                             |
| Largest diff. peak<br>and hole/(e·nm <sup>-3</sup> )    | 3.201 and -3576                                                       | 3.201 and -3576                                                      |
